# Supplementary material for: Asciminib Mitigates DNA Damage Stress Signaling Induced by Cyclophosphamide in the Ovary
Source: MDPI journal article supplement (doi:10.3390/ijms22031395), 2021-01-30

Supplementary figures.

Supplementary Figure 1 Asciminib attenuates DNA Damage Response induced by cyclophosphamide.

(A) Western blotting analysis and relative quantification of ovarian lysates from female pups (p7) injected with Cy 100mg/kg alone or in combination with various doses of Asciminib as indicated and sacrificed within 18 h after injection. Cy injection did induce the phosphorylation on H2AX on Ser139 ( $\gamma$ H2AX) *in vivo* in mice. Of note,  $\gamma$ H2AX was absent in the controls and partially prevented by co-treatment with Asciminib.

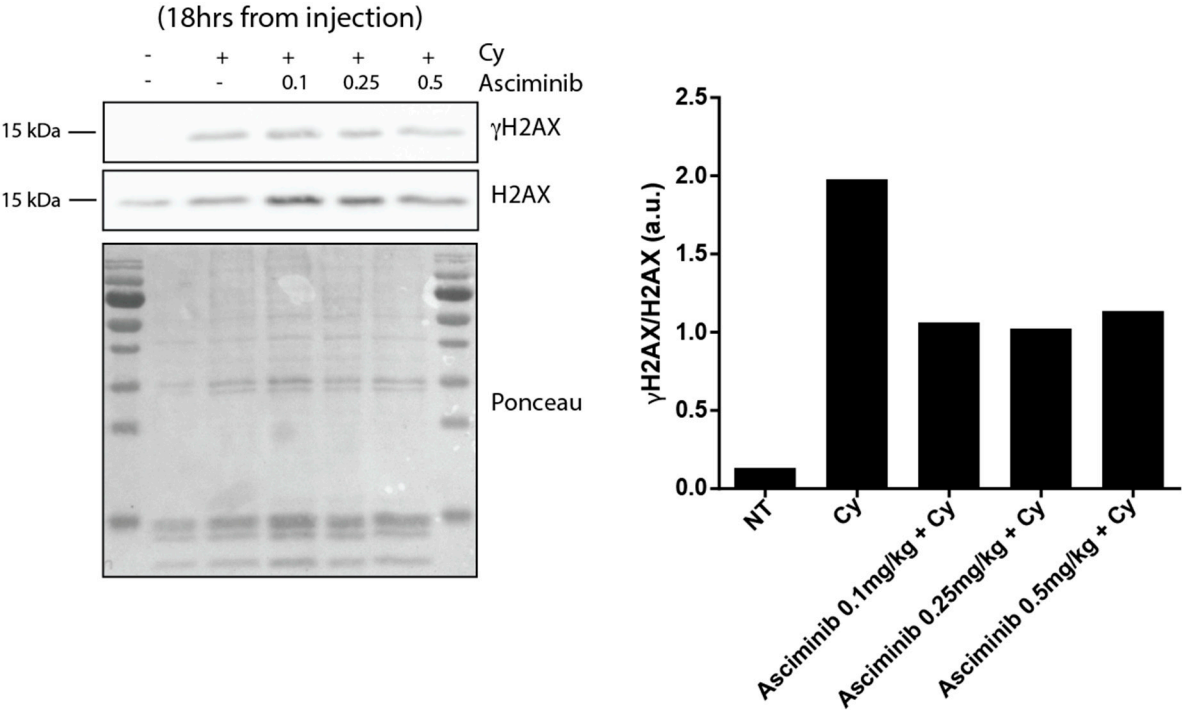

**Supplementary Figure 2. A high dose of Asciminib did not protect the ovarian reserve from cyclophosphamide treatment.** Ovaries of each experimental group were dissected three days after injection (mice were injected using with Cy 100 mg/kg alone or in tandem with Asciminib 1 mg/kg) and then analyzed by IHC assay with Msy2 antibody. Ovaries from independent experiments were analyzed. In the box plot, each dot represents the average primordial + primary follicles numbers per section of each gonad analyzed. Scale Bar 100µm.

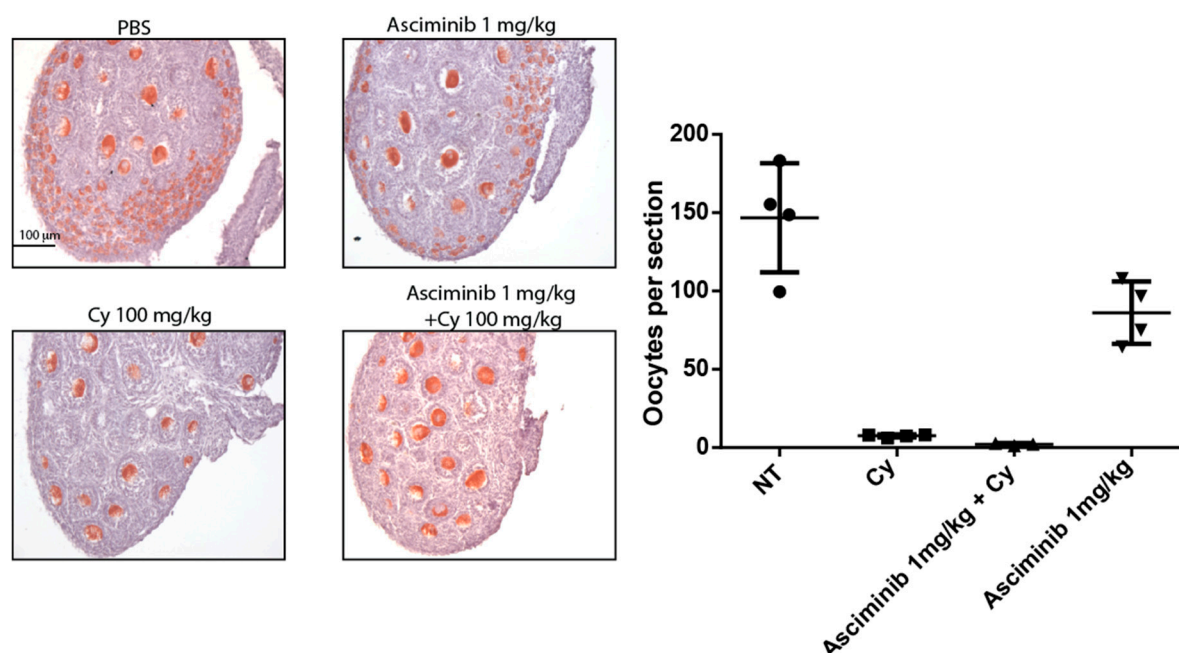

#### List of various Antibodies used in our IF assays

| Antigen          | Host   | Function                                 | Purchased from                   |
|------------------|--------|------------------------------------------|----------------------------------|
| Msy-2            | Mouse  | Germ cells- specific protein (cytosolic) | Santa Cruz (sc-21316)            |
| p-AKT (T308)     | Rabbit | Follicle activation pathway              | Santa Cruz sc-16646-R            |
| p63              | Rabbit | Germ cell- specific protein (nuclear)    | Home-made                        |
| γH2AX (S139)     | Mouse  | DNA damage early marker                  | Millipore 05-636                 |
| p-DNA-PK (S2056) | Rabbit | DDR apical kinase                        | SAB4504169 Sigma Aldrich         |
| p-ATM (S1981)    | Mouse  | DDR apical kinase                        | Rockland 200-301-500             |
| p-p53 (S15)      | Rabbit | DDR effector                             | Cell Signaling Technology (9284) |
| Cleaved PARP     | Rabbit | Nuclear Marker for Apoptosis             | Cell Signaling Technology (9544) |

Schematic representation of the treatment and the timing of ovary collection.

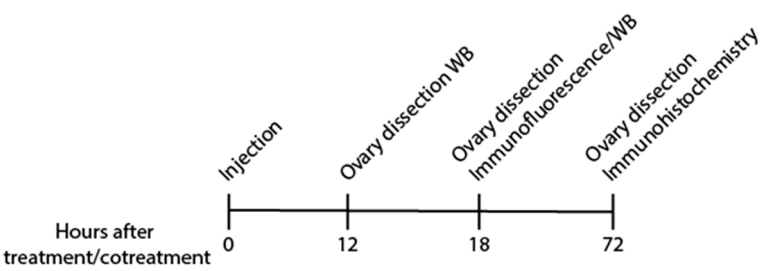

Supplement: s1 [file s1]
